# Supplementary material for: Adenosine, Schizophrenia and Cancer: Does the Purinergic System Offer a Pathway to Treatment?
Source: MDPI journal article supplement (doi:10.3390/ijms231911835), 2022-10-05
Supplement: s1 [file s1]

**Supplementary Figure 1:** Small molecule structures for adenosine system modulators identified in Table 3

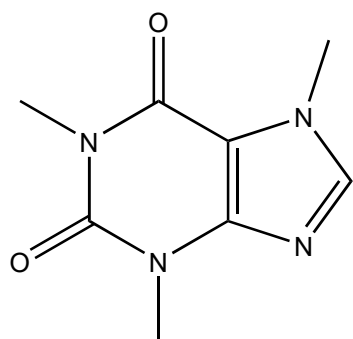

caffeine

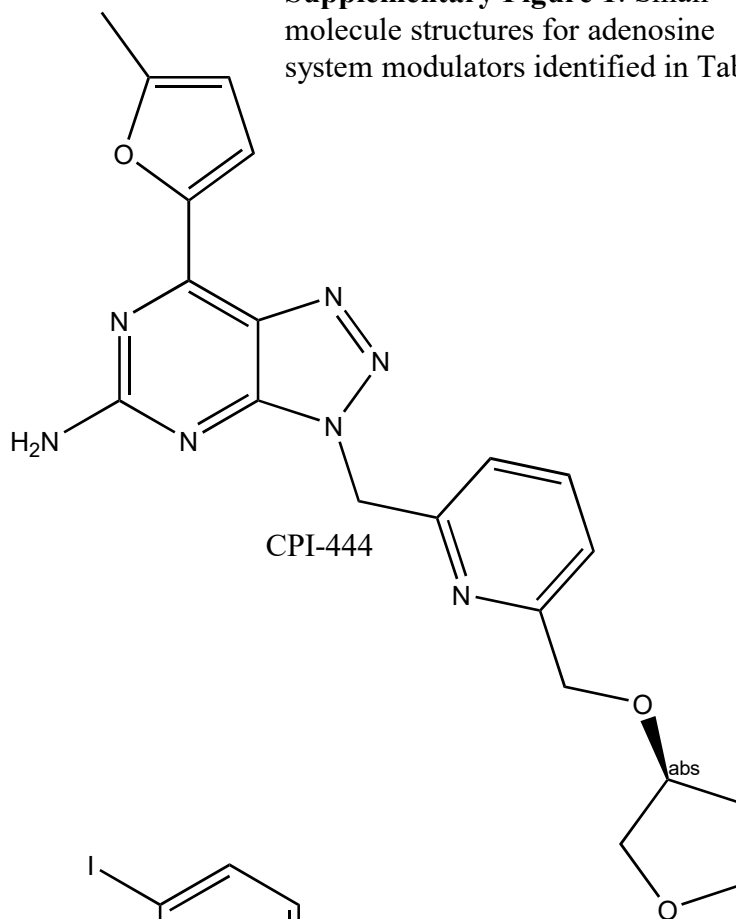

CPI-444

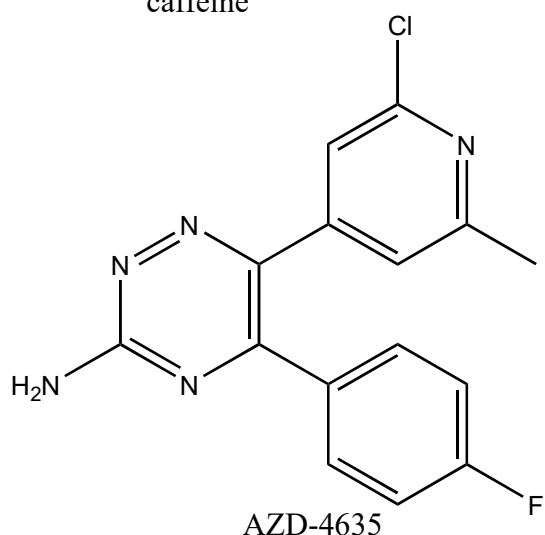

AZD-4635

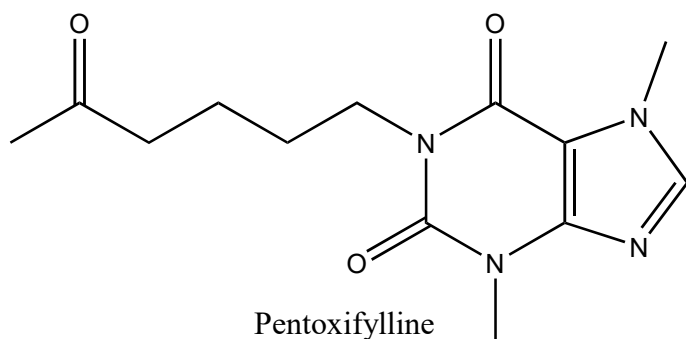

Pentoxifylline

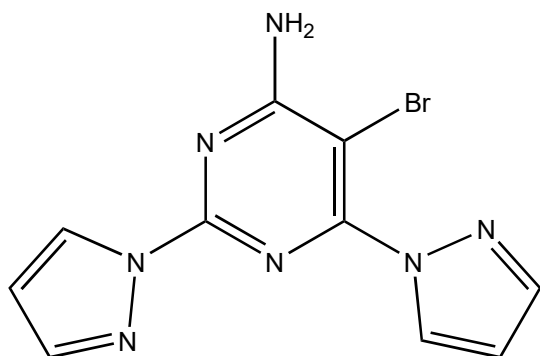

NIR-178

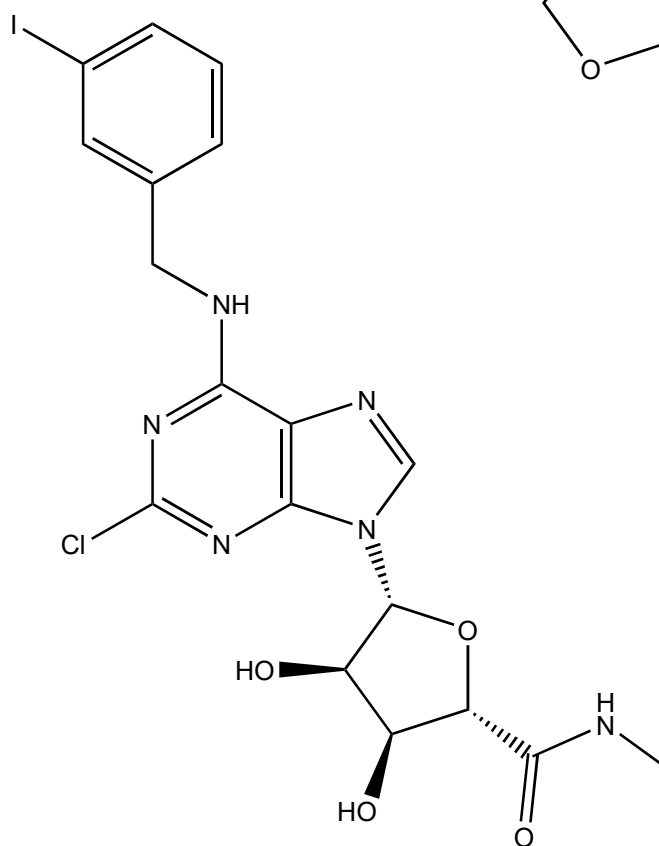

CF-102

**Supplementary Table 1: Purinergic receptors.** Nomenclature, associated ligands, G-proteins, and ions.

| Protein name                       | Gene Name | Ligand          | G-protein                                      | Ions                                                |
|------------------------------------|-----------|-----------------|------------------------------------------------|-----------------------------------------------------|
| Adenosine receptor A <sub>1</sub>  | ADORA1    | Adenosine       | G <sub>i</sub> and G <sub>o</sub>              | -                                                   |
| Adenosine receptor A <sub>2A</sub> | ADORA2A   | Adenosine       | G <sub>s</sub> <sup>c</sup> , G <sub>olf</sub> |                                                     |
| Adenosine receptor A <sub>2B</sub> | ADORA2B   | Adenosine       | G <sub>s</sub> <sup>c</sup>                    |                                                     |
| Adenosine receptor A <sub>3</sub>  | ADORA3    | Adenosine       | G <sub>i3</sub> , G <sub>q</sub>               |                                                     |
| P2X purinoceptor 1                 | P2RX1     | ATP             | G <sub>αq</sub>                                | Na <sup>+</sup> , K <sup>+</sup> , Ca <sup>2+</sup> |
| P2X purinoceptor 2                 | P2RX2     | ATP             | G <sub>αq</sub>                                | Na <sup>+</sup> , K <sup>+</sup> , Ca <sup>2+</sup> |
| P2X purinoceptor 3                 | P2RX3     | ATP             | G <sub>αq</sub>                                | Na <sup>+</sup> , K <sup>+</sup> , Ca <sup>2+</sup> |
| P2X purinoceptor 4                 | P2RX4     | ATP             | G <sub>αq</sub>                                | Na <sup>+</sup> , K <sup>+</sup> , Ca <sup>2+</sup> |
| P2X purinoceptor 5                 | P2RX5     | ATP             | G <sub>αq</sub>                                | Na <sup>+</sup> , K <sup>+</sup> , Ca <sup>2+</sup> |
| P2X purinoceptor 6                 | P2RX6     | ATP             | G <sub>αq</sub>                                | Na <sup>+</sup> , K <sup>+</sup> , Ca <sup>2+</sup> |
| P2X purinoceptor 7                 | P2RX7     | ATP             | G <sub>αq</sub>                                | Na <sup>+</sup> , K <sup>+</sup> , Ca <sup>2+</sup> |
| P2Y purinoceptor 1                 | P2RY1     | ADP             | G <sub>q</sub>                                 | -                                                   |
| P2Y purinoceptor 2                 | P2RY2     | ATP/UTP         | G <sub>q, o, 12</sub>                          |                                                     |
| P2Y purinoceptor 4                 | P2RY4     | UTP             | G <sub>q,o</sub>                               |                                                     |
| P2Y purinoceptor 6                 | P2RY6     | UDP             | G <sub>q, 12/13</sub>                          |                                                     |
| P2Y purinoceptor 11                | P2RY11    | ATP             | G <sub>q, s</sub>                              |                                                     |
| P2Y purinoceptor 13                | P2RY13    | ADP             | G <sub>i/o</sub>                               |                                                     |
| P2Y purinoceptor 14                | P2RY14    | UPD/UDP-glucose |                                                |                                                     |

Purinergic receptor ligands, ions, and G-proteins adapted from ref [60-68]
